Published by Portland Press Limited six times a year  
(February, April, June, August, October and December).  
The Biochemist © 2022 Biochemical Society  
ISSN 1740-1194 (Online)

First Floor  
10 Queen Street Place  
London EC4R 1BE  
email: [editorial@portlandpress.com](mailto:editorial@portlandpress.com)  
website: <https://portlandpress.com/biochemist>  
Registered charity no. 253894

**Science Editor:** Heather Doran (University of Dundee, UK)

**Editorial Board:** David Pye, Shane Hegarty,  
Matthew Lloyd, Harriet Groom, Roseanna Hare  
and Doug Marshall.

**Production Editor:** Kimberly Bayley-Tweed

**Editorial team:** Orla Lappin

**Design by** Peter Jones

*The Editors are pleased to consider items submitted for publication. Opinions expressed in signed articles are not necessarily those of the Society. The information in this issue was correct at the time of publication.*

## Urban myths and debunking false science

by Heather Doran, University of Dundee

In this issue of *The Biochemist*, we explore how we can disprove urban myths and debunk false science.

We spoke to Sense about Science, a partner organization of the Biochemical Society which works to ensure science and evidence are prioritized in public life, and you can find out more about the organization and their work in our interview with Nita Pillai, Director of Programmes at Sense about Science. You can also find out about the inspiring winner of the 2022 John Maddox Prize, which is awarded by Sense about Science and *Nature* to people who have stood up for science and evidence in the face of adversity. Find out about this year's winner, Eucharia Nwaichi by reading the interview she gave to Biochemical Society member, Charlay Wood. . In this issue, you can also find out about the science curriculum in schools and how we can teach students to recognize scientific misinformation, and Kevin Murach and colleagues also dispel common myths to do with muscle.

This issue also includes an article from one of the recipients of our 2021 Diversity in Science grants, who used the funding to explore the lived experiences of black women in STEM UK Higher Education and are now sharing their findings with the wider community.

Finally, I am pleased to say that we have now announced our 2023 issue themes. We encourage anyone who is interested in writing a feature article for us to get in touch with the editorial team, if your work is related to one of the below areas:

- Protein engineering (February 2023)
- Infectious diseases (April 2023)
- Fungal economics (June 2023)
- Gene therapy (August 2023)
- Death and decomposition (October 2023)
- Science fiction becomes science fact (December 2023)
- Psychedelic therapies (February 2024)

I wish all readers a pleasant festive season and a Happy New Year – see you in 2023! ■

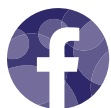

Find us on Facebook at [Biochemical Society](#)

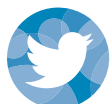

Follow us on Twitter [@The\\_Biochemist](#)
